# Supplementary material
Source: PubMed Central journal article supplement (PMC7482099)
Supplement: NIHMS1624483-supplement-Supplementary_table_S1___S2.pdf [file NIHMS1624483-supplement-Supplementary_table_S1___S2.pdf]

Table S1. Demographic Characteristics of Participants at Initial Visit.

| AD Cohort (N=11,871)               |                  |                             |                             |                             |                           |                           |                          |         |
|------------------------------------|------------------|-----------------------------|-----------------------------|-----------------------------|---------------------------|---------------------------|--------------------------|---------|
|                                    | All<br>(N=11871) | £3£3<br>(n=6454,<br>54.37%) | £3£4<br>(n=3239,<br>27.28%) | £2£3<br>(n=1308,<br>11.02%) | £4£4<br>(n=526,<br>4.43%) | £2£4<br>(n=294,<br>2.48%) | £2£2<br>(n=50,<br>0.42%) | P-Value |
| Age (year)<br>(Mean±SD)            | 72.1±10.4        | 72.8±10.4                   | 70.8±9.8                    | 73.1±11.6                   | 68.2±8.7                  | 71.5±11.2                 | 73.9±10.1                | <0.0001 |
| Age (n, %)                         |                  |                             |                             |                             |                           |                           |                          | <0.0001 |
| <65                                | 2407 ( 20.3)     | 1212 ( 18.8)                | 717 ( 22.1)                 | 249 ( 19.0)                 | 160 ( 30.4)               | 62 ( 21.1)                | 7 ( 14.0)                |         |
| 65-74                              | 4475 ( 37.7)     | 2313 ( 35.8)                | 1355 ( 41.8)                | 429 ( 32.8)                 | 249 ( 47.3)               | 110 ( 37.4)               | 19 ( 38.0)               |         |
| 75-84                              | 3750 ( 31.6)     | 2144 ( 33.2)                | 950 ( 29.3)                 | 442 ( 33.8)                 | 103 ( 19.6)               | 94 ( 32.0)                | 17 ( 34.0)               |         |
| >85                                | 1239 ( 10.4)     | 785 ( 12.2)                 | 217 ( 6.7)                  | 188 ( 14.4)                 | 14 ( 2.7)                 | 28 ( 9.5)                 | 7 ( 14.0)                |         |
| Sex (n, %)                         |                  |                             |                             |                             |                           |                           |                          | 0.08    |
| Male                               | 5243 ( 44.2)     | 2828 ( 43.8)                | 1459 ( 45.0)                | 550 ( 42.0)                 | 252 ( 47.9)               | 126 ( 42.9)               | 28 ( 56.0)               |         |
| Female                             | 6628 ( 55.8)     | 3626 ( 56.2)                | 1780 ( 55.0)                | 758 ( 58.0)                 | 274 ( 52.1)               | 168 ( 57.1)               | 22 ( 44.0)               |         |
| Education<br>(Year)<br>(Mean±SD)   | 16.0± 2.8        | 16.0± 2.8                   | 16.1± 2.7                   | 16.0±2.8                    | 16.1±2.9                  | 16.2±2.7                  | 16.2±2.4                 | 0.725   |
| Diagnosis of<br>MCI (n, %)         | 3566 ( 30.0)     | 1674 ( 25.9)                | 1179 ( 36.4)                | 322 ( 24.6)                 | 287 ( 54.6)               | 94 ( 32.0)                | 10 ( 20.0)               | <0.0001 |
| Year of<br>Initial Visit<br>(n, %) |                  |                             |                             |                             |                           |                           |                          | 0.0006  |
| 2005-2007                          | 5336 ( 44.9)     | 2984 ( 46.2)                | 1373 ( 42.4)                | 624 ( 47.7)                 | 207 ( 39.4)               | 127 ( 43.2)               | 21 ( 42.0)               |         |
| 2008-2012                          | 4219 ( 35.5)     | 2261 ( 35.0)                | 1215 ( 37.5)                | 422 ( 32.3)                 | 191 ( 36.3)               | 111 ( 37.8)               | 19 ( 38.0)               |         |
| 2013-2017                          | 2316 ( 19.5)     | 1209 ( 18.7)                | 651 ( 20.1)                 | 262 ( 20.0)                 | 128 ( 24.3)               | 56 ( 19.0)                | 10 ( 20.0)               |         |

| MCI Cohort (N=8,305)               |                 |                             |                            |                            |                           |                           |                          |         |
|------------------------------------|-----------------|-----------------------------|----------------------------|----------------------------|---------------------------|---------------------------|--------------------------|---------|
|                                    | All<br>(N=8305) | Ε3Ε3<br>(n=4780,<br>57.56%) | Ε3Ε4<br>(n=2060,<br>24.8%) | Ε2Ε3<br>(n=986,<br>11.87%) | Ε4Ε4<br>(n=239,<br>2.88%) | Ε2Ε4<br>(n=200,<br>2.41%) | Ε2Ε2<br>(n=40,<br>0.48%) | P-Value |
| Age (year)<br>(Mean±SD)            | 71.5 ( 10.8)    | 72.3 ( 10.5)                | 69.8 ( 10.5)               | 72.7 ( 11.8)               | 65.9 ( 9.8)               | 70.6 ( 12.0)              | 73.6 ( 10.7)             | <0.0001 |
| Age (n, %)                         | <0.0001         |                             |                            |                            |                           |                           |                          |         |
| <65                                | 1834 ( 22.1)    | 945 ( 19.8)                 | 535 ( 26.0)                | 203 ( 20.6)                | 97 ( 40.6)                | 48 ( 24.0)                | 6 ( 15.0)                |         |
| 65-74                              | 3152 ( 38.0)    | 1782 ( 37.3)                | 863 ( 41.9)                | 321 ( 32.6)                | 99 ( 41.4)                | 71 ( 35.5)                | 16 ( 40.0)               |         |
| 75-84                              | 2447 ( 29.5)    | 1499 ( 31.4)                | 512 ( 24.9)                | 324 ( 32.9)                | 37 ( 15.5)                | 64 ( 32.0)                | 11 ( 27.5)               |         |
| >85                                | 872 ( 10.5)     | 554 ( 11.6)                 | 150 ( 7.3)                 | 138 ( 14.0)                | 6 ( 2.5)                  | 17 ( 8.5)                 | 7 ( 17.5)                |         |
| Sex (n, %)                         | 0.124           |                             |                            |                            |                           |                           |                          |         |
| Male                               | 3239 ( 39.0)    | 1866 ( 39.0)                | 818 ( 39.7)                | 360 ( 36.5)                | 100 ( 41.8)               | 73 ( 36.5)                | 22 ( 55.0)               |         |
| Female                             | 5066 ( 61.0)    | 2914 ( 61.0)                | 1242 ( 60.3)               | 626 ( 63.5)                | 139 ( 58.2)               | 127 ( 63.5)               | 18 ( 45.0)               |         |
| Education<br>(Year)<br>(Mean±SD)   | 16.1 ( 2.7)     | 16.1 ( 2.7)                 | 16.2 ( 2.6)                | 16.0 ( 2.6)                | 16.1 ( 2.9)               | 16.2 ( 2.5)               | 16.5 ( 2.3)              | 0.429   |
| Year of<br>Initial Visit<br>(n, %) | 0.032           |                             |                            |                            |                           |                           |                          |         |
| 2005-2007                          | 3796 ( 45.7)    | 2225 ( 46.5)                | 890 ( 43.2)                | 484 ( 49.1)                | 91 ( 38.1)                | 86 ( 43.0)                | 20 ( 50.0)               |         |
| 2008-2012                          | 2869 ( 34.5)    | 1642 ( 34.4)                | 742 ( 36.0)                | 310 ( 31.4)                | 89 ( 37.2)                | 73 ( 36.5)                | 13 ( 32.5)               |         |
| 2013-2017                          | 1640 ( 19.7)    | 913 ( 19.1)                 | 428 ( 20.8)                | 192 ( 19.5)                | 59 ( 24.7)                | 41 ( 20.5)                | 7 ( 17.5)                |         |

Table S2. The Hazard Ratio of APOE Genotype from Discrete-time Proportional Hazards Model.

|                                                     | AD Cohort<br>(N=11,871) |         |                   |         | MCI Cohort<br>(N=8,305) |         |                   |         |
|-----------------------------------------------------|-------------------------|---------|-------------------|---------|-------------------------|---------|-------------------|---------|
|                                                     | Unadjusted Model        |         | Adjusted Model*   |         | Unadjusted Model        |         | Adjusted Model*   |         |
|                                                     | HR (95% CI)             | P-value | HR (95% CI)       | P-value | HR (95% CI)             | P-value | HR (95% CI)       | P-value |
| ε3ε3 (Reference group)                              |                         |         |                   |         |                         |         |                   |         |
| ε3ε4                                                | 1.99 (1.80, 2.21)       | <.0001  | 1.93 (1.74, 2.15) | <.0001  | 1.17 (1.05, 1.31)       | 0.005   | 1.31 (1.17, 1.46) | <.0001  |
| ε2ε3                                                | 0.79 (0.65, 0.96)       | 0.019   | 0.85 (0.70, 1.04) | 0.111   | 0.97 (0.83, 1.14)       | 0.753   | 0.94 (0.80, 1.10) | 0.436   |
| ε4ε4                                                | 3.26 (2.77, 3.84)       | <.0001  | 2.79 (2.35, 3.31) | <.0001  | 1.66 (1.31, 2.09)       | <.0001  | 2.30 (1.82, 2.92) | <.0001  |
| ε2ε4                                                | 1.49 (1.12, 1.99)       | 0.006   | 1.66 (1.24, 2.21) | 0.001   | 1.32 (1.00, 1.74)       | 0.049   | 1.42 (1.07, 1.88) | 0.014   |
| ε2ε2                                                | 0.47 (0.15, 1.47)       | 0.196   | 0.43 (0.14, 1.35) | 0.151   | 1.08 (0.56, 2.08)       | 0.824   | 1.07 (0.55, 2.07) | 0.840   |
| ε2ε4 comparing to other genotype as reference group |                         |         |                   |         |                         |         |                   |         |
| ε2ε4 vs.<br>ε3ε4                                    | 0.75 (0.56, 1.00)       | 0.049   | 0.86 (0.64, 1.14) | 0.298   | 1.13 (0.85, 1.50)       | 0.402   | 1.09 (0.81, 1.44) | 0.581   |
| ε2ε4 vs.<br>ε4ε4                                    | 0.46 (0.34, 0.63)       | <.0001  | 0.59 (0.43, 0.82) | 0.001   | 0.80 (0.56, 1.13)       | 0.205   | 0.62 (0.43, 0.88) | 0.007   |
| ε2ε4 vs.<br>ε2ε3                                    | 1.89 (1.36, 2.64)       | <.0001  | 1.94 (1.40, 2.72) | <.0001  | 1.36 (1.00, 1.84)       | 0.051   | 1.51 (1.11, 2.06) | 0.009   |
| ε2ε4 vs.<br>ε2ε2                                    | 3.16 (0.98, 10.1)       | 0.053   | 3.81 (1.19, 12.2) | 0.025   | 1.23 (0.60, 2.49)       | 0.572   | 1.33 (0.65, 2.69) | 0.436   |

Note. \*Models were adjusted for age, sex, education, baseline cognitive status and year of initial visit.
